# Supplementary material for: Molecular reconfigurations enabling active liquid–solid interfaces for ultrafast Li diffusion kinetics in the 3D framework of a garnet solid-state electrolyte
Source: Royal Society of Chemistry journal article supplement (doi:10.1039/d1ta03569j), 2021-01-01
Supplement: d1ta03569j1.pdf [file d1ta03569j1.pdf]

## Supporting Information

### Molecular Reconfigurations Enabling Active Liquid-Solid Interfaces for Ultrafast Li Diffusion Kinetics in 3D Framework of Garnet Solid State Electrolyte

Fuxin Wei, Shufen Wu, Jiliang Zhang, Hongyang Fan, Liuyang Wang, Vincent Wing-hei Lau, Sizhou Hou, Minmin Zhang, Jiafeng Zhang\*, Bo Liang\*, Ruirui Zhao\*

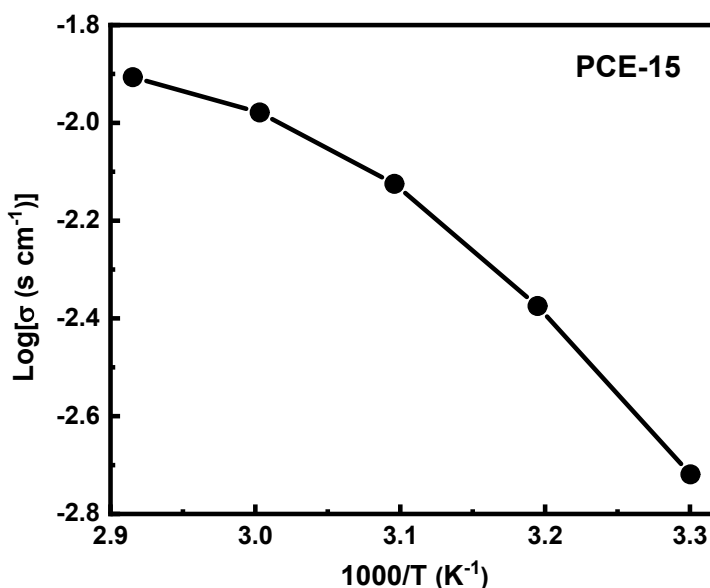

Figure S1. Arrhenius plot of PCE-15 conductivity.

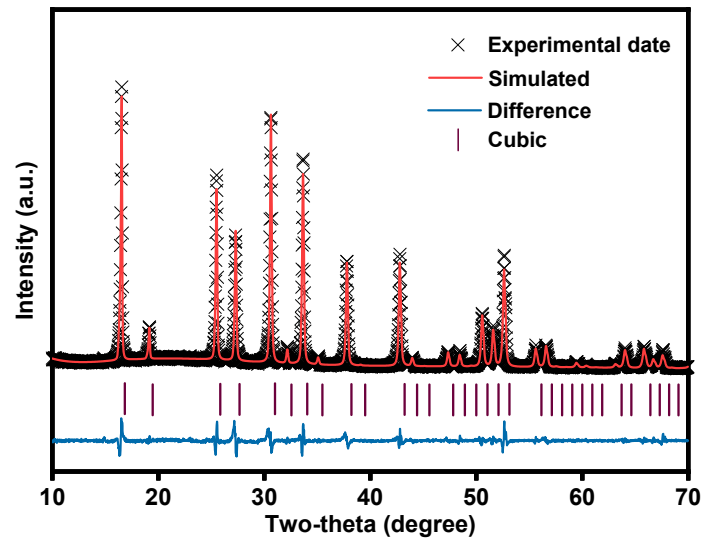

Figure S2. The XRD pattern and Rietveld refinement result for LLZO.

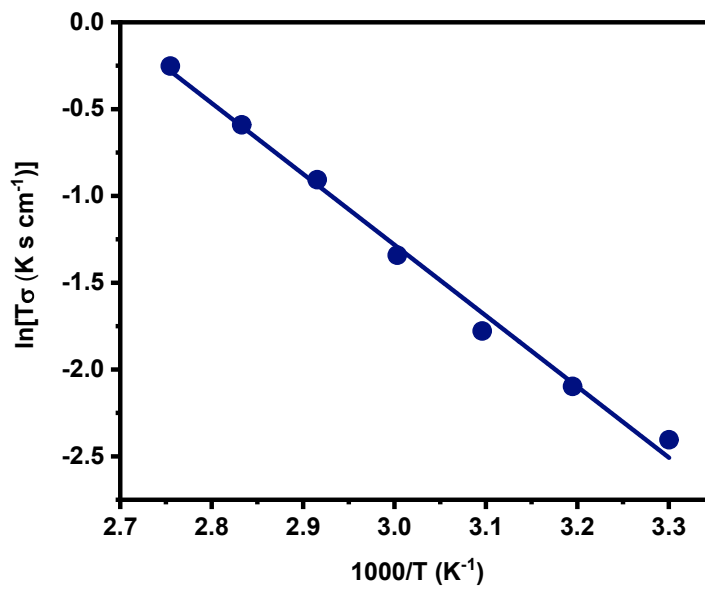

Figure S3. Arrhenius plot of LLZO conductivity.

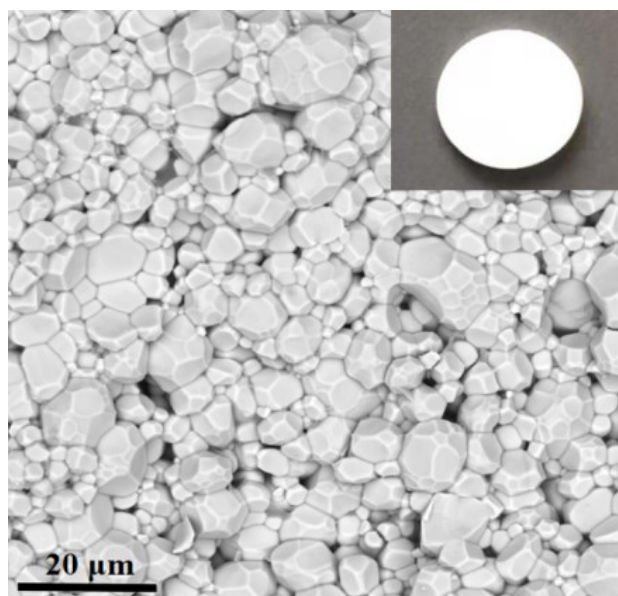

**Figure S4.** Cross-sectional SEM image of LLZO. The inset shows an optical image of the LLZO pellet.

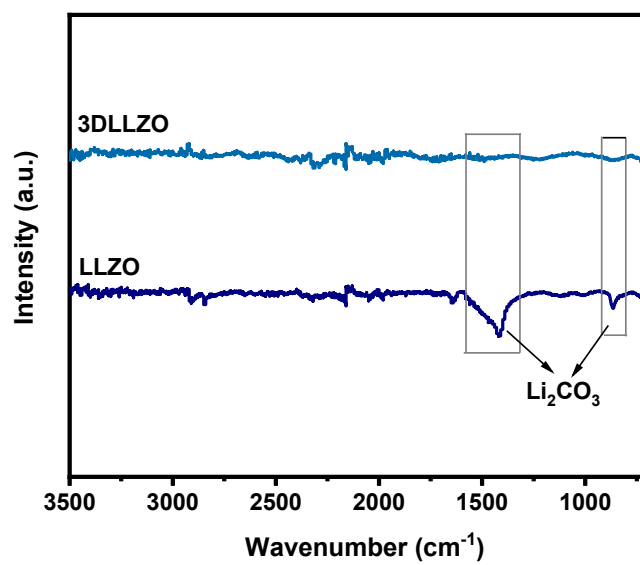

**Figure S5.** FTIR spectra of 3DLLZO and LLZO.

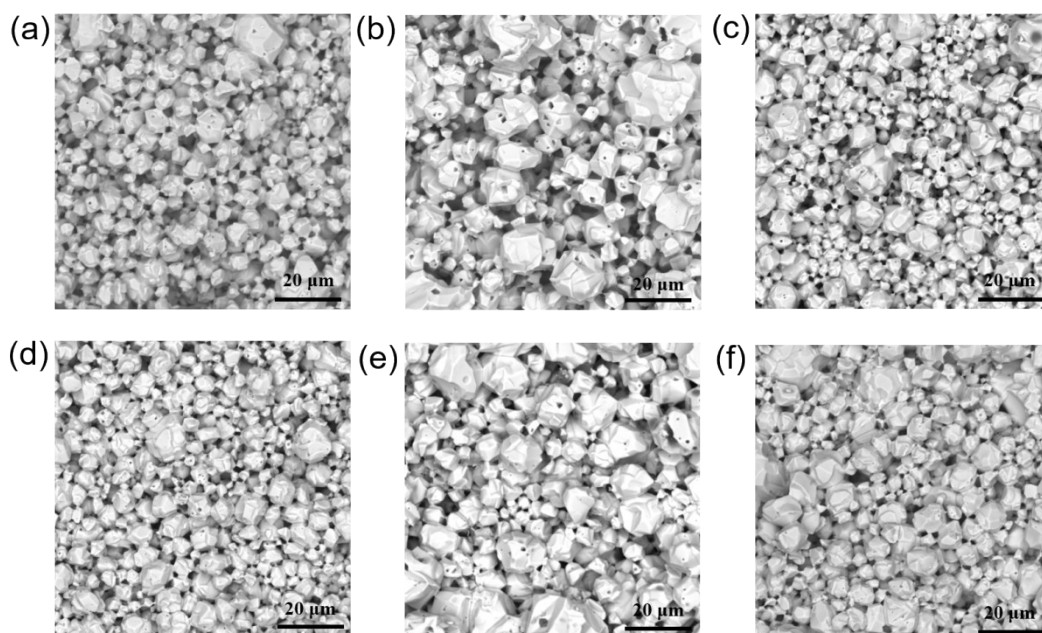

**Figure S6.** Surface SEM image of LLZO treated with HNO<sub>3</sub> at a) 2.5 min, b) 5min, c) 7.5 min, d) 10 min, e) 15 min and f) 20 min.

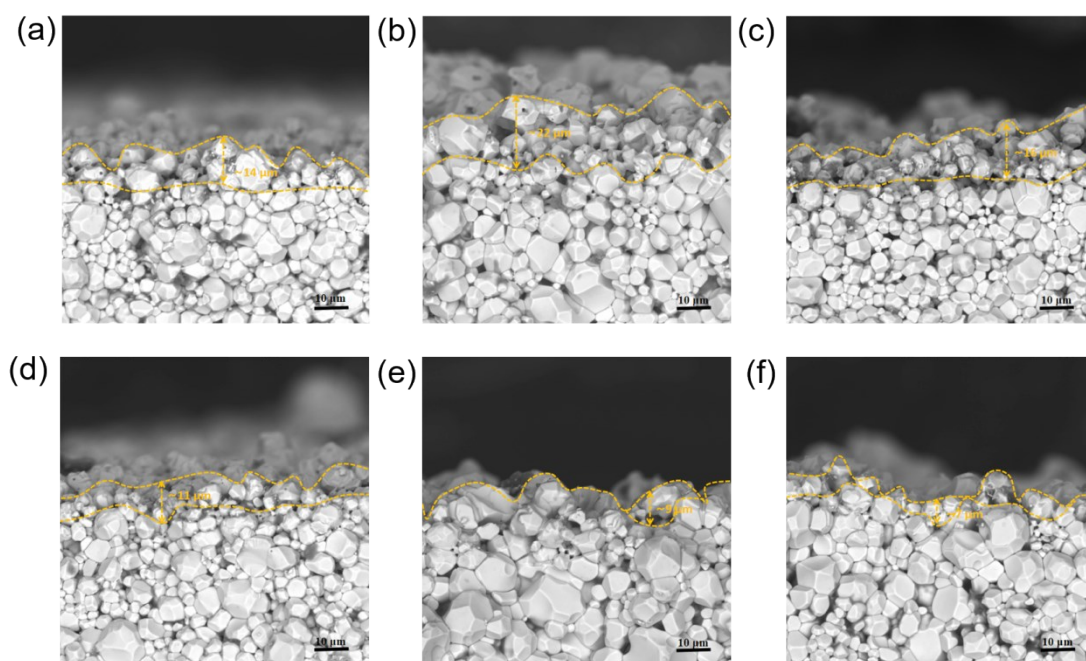

**Figure S7.** Cross-sectional SEM image of LLZO treated with HNO<sub>3</sub> at a) 2.5 min, b) 5min, c) 7.5 min, d) 10 min, e) 15 min and f) 20 min.

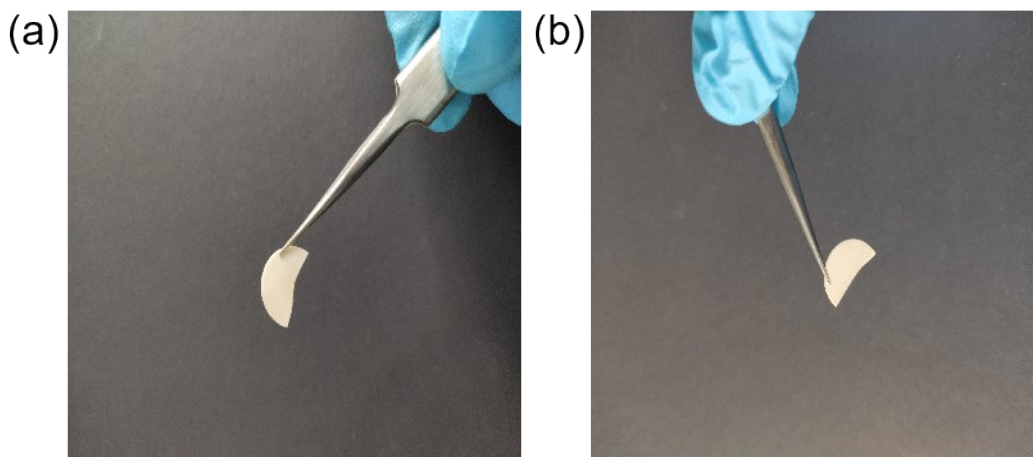

**Figure S8.** The optical image of LLZO a) before and b) after soaking in SN for ten days.

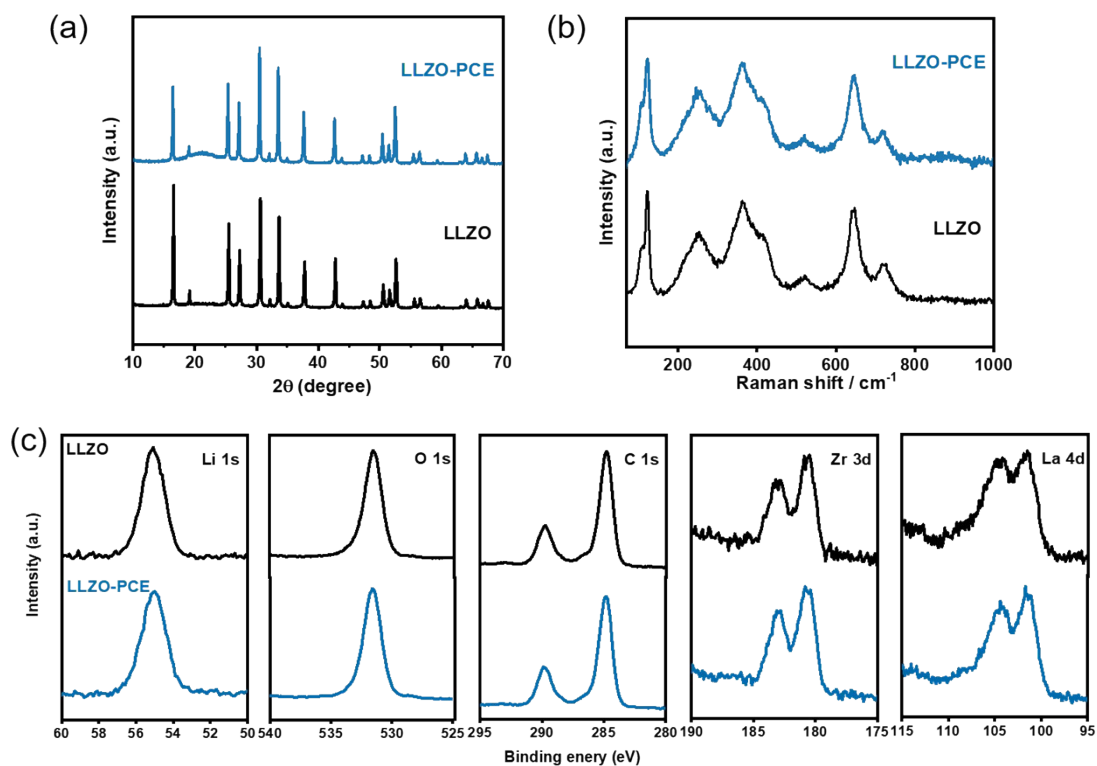

**Figure S9.** a) X-ray diffraction patterns, b) Raman spectra and c) XP spectra of LLZO before and after immersion in PCE for ten days.

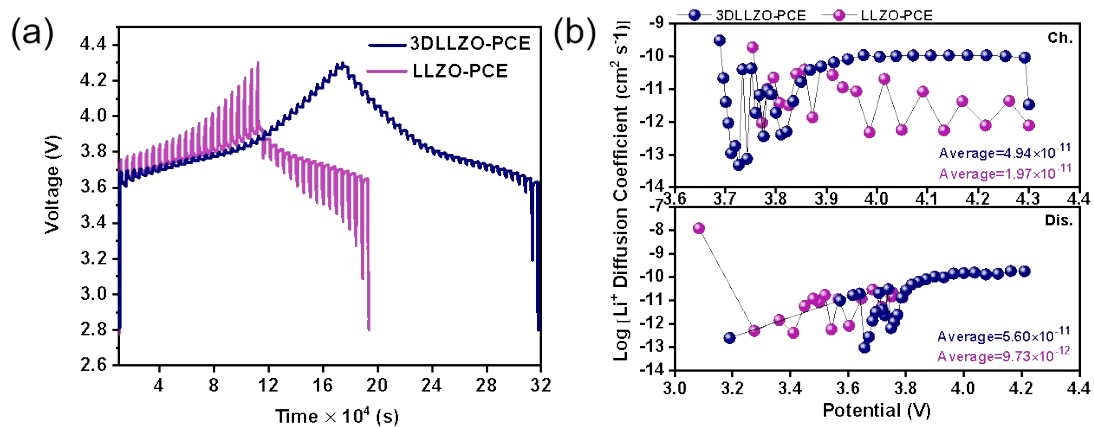

**Figure S10.** a) The charge and discharge GITT curves and b) the  $Li^+$  diffusion coefficients at different voltages of NCM/3DLLZO-PCE/Li and NCM/LLZO-PCE/Li.

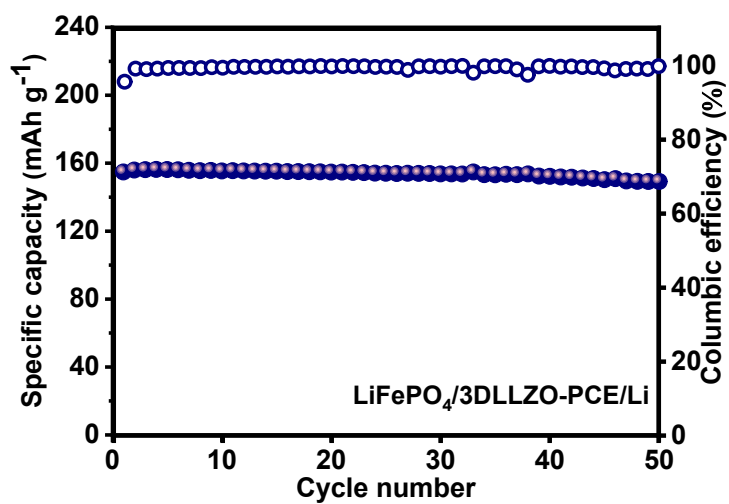

**Figure S11.** Cycling performance of LiFePO<sub>4</sub>/3DLLZO-PCE/Li cell.

**Figure S12.** Equivalent circuits for different cells characterized in Figure 5.

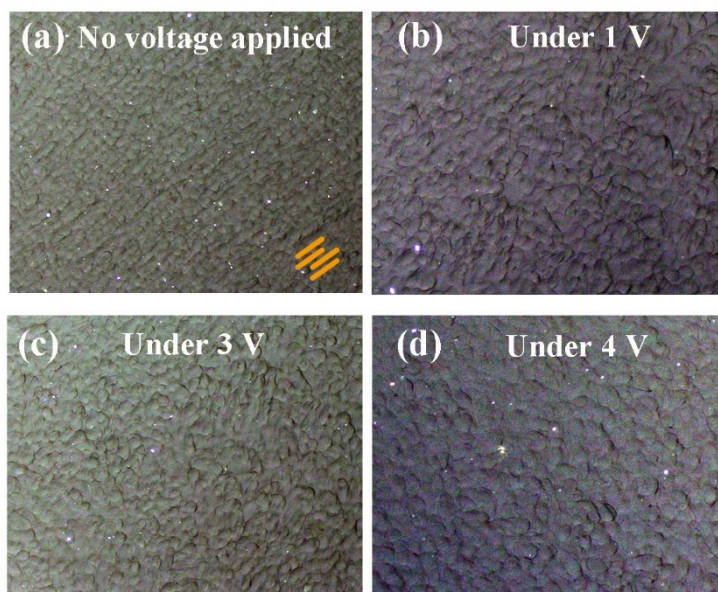

**Figure S13.** The optical microscopy images of the PCE under different potentials. The morphological change of plastic crystals is generally related to the molecular reorganization [1].

**Table S1.** The values of  $I_0$ ,  $I_{ss}$ ,  $R_0$ ,  $R_{ss}$ , and the calculated values of  $t_{Li^+}$  at RT.

| electrolytes | $I_0/\mu\text{A}$ | $I_{ss}/\mu\text{A}$ | $R_0/\Omega$ | $R_{ss}/\Omega$ | $\Delta V/\text{mV}$ | $t_{Li^+}$ |
|--------------|-------------------|----------------------|--------------|-----------------|----------------------|------------|
| 3DLLZO-PCE   | 11.40             | 8.54                 | 691          | 883             | 10                   | 0.65       |
| LLZO-PCE     | 11.30             | 6.97                 | 810          | 1130            | 10                   | 0.25       |

**Table S2.** Performance comparison of solid state batteries with NCM as cathode material using different modification strategies.

| Cathode composite                                                         | Solid electrolyte                                                                                         | Specific parameters                       | test Strategy                                                                                                             | Discharge capacity (mAh g <sup>-1</sup> ) | Capacity retention after Ref. cycling(%) | Ref.             |
|---------------------------------------------------------------------------|-----------------------------------------------------------------------------------------------------------|-------------------------------------------|---------------------------------------------------------------------------------------------------------------------------|-------------------------------------------|------------------------------------------|------------------|
| Li(Ni <sub>0.5</sub> Mn <sub>0.3</sub> Co <sub>0.2</sub> )O <sub>2</sub>  | Li <sub>10</sub> GeP <sub>2</sub> S <sub>12</sub>                                                         | RT 0.1C 1.9–3.8V                          | An interfacial layer of LiNbTaO <sub>3</sub>                                                                              | 156.4(1st)<br>94.5(150th)                 | 60                                       | 2                |
| LiNi <sub>0.33</sub> Mn <sub>0.33</sub> Co <sub>0.33</sub> O <sub>2</sub> | Li <sub>6.28</sub> La <sub>3</sub> Zr <sub>2</sub> Al <sub>0.24</sub> O <sub>12</sub>                     | 100°C<br>cm <sup>-2</sup> 2.0–4.5 V       | 10 mA A Li <sub>2</sub> SiO <sub>3</sub> interlayer                                                                       | 138(1st)<br>≈110(10th)                    | 3                                        | 4                |
| LiNi <sub>0.6</sub> Mn <sub>0.2</sub> Co <sub>0.2</sub> O <sub>2</sub>    | Li <sub>6.4</sub> La <sub>3</sub> Zr <sub>1.4</sub> Ta <sub>0.6</sub> O <sub>12</sub>                     | RT 0.05C 3.0–4.2V                         | Li <sub>3</sub> BO <sub>3</sub> as sintering aid and buffer layer                                                         | 106(1st)                                  | —                                        | 4                |
| LiNi <sub>0.5</sub> Co <sub>0.2</sub> Mn <sub>0.3</sub> O <sub>2</sub>    | Li <sub>6.5</sub> La <sub>3</sub> Zr <sub>1.5</sub> Ta <sub>0.5</sub> O <sub>12</sub>                     | 25°C                                      | 0.2C<br>10 μL of EC/DMC electrolyte wetting at the interface                                                              | ≈142(1st)<br>≈115(150th)                  | 81                                       | 5                |
| LiNi <sub>0.5</sub> Co <sub>0.2</sub> Mn <sub>0.3</sub> O <sub>2</sub>    | Li <sub>6.75</sub> La <sub>3</sub> Zr <sub>1.75</sub> Ta <sub>0.25</sub> O <sub>12</sub>                  | 80 °C, 5 μA·cm <sup>-2</sup><br>3.0–4.6 V | In-situ spinel Li[Ti <sub>0.1</sub> Mn <sub>0.9</sub> ] <sub>2</sub> O <sub>4</sub> formed at the surface after annealing | 123.3 (1st)<br>76.6 (5th)                 | 62                                       | 6                |
| LiNi <sub>0.5</sub> Co <sub>0.2</sub> Mn <sub>0.3</sub> O <sub>2</sub>    | Li <sub>6.35</sub> Ga <sub>0.15</sub> La <sub>3</sub> Zr <sub>1.8</sub> Nb <sub>0.2</sub> O <sub>12</sub> | RT 0.1C 2.8–4.3V                          | Interface layer of 3D LLZO frame combined with plastic crystal electrolyte                                                | 165.3 (1st)<br>156.4 (100th)              | 95                                       | <b>This work</b> |



**Table S3.** Literature overview of the strategies to overcome the interfacial resistance of  $R_{\text{cathode/SE}}$  and comparison with the current work.

| Electrolyte                                                                                | Test temperature (°C) | Strategy                                                                                          | The interfacial resistance of $R_{\text{cathode/SE}}$ ( $\Omega \text{ cm}^2$ ) | Ref.             |
|--------------------------------------------------------------------------------------------|-----------------------|---------------------------------------------------------------------------------------------------|---------------------------------------------------------------------------------|------------------|
| $\text{Li}_{6.4}\text{La}_3\text{Zr}_{1.4}\text{Ta}_{0.6}\text{O}_{12}$                    | RT                    | A plastic crystal interlayer based on succinonitrile with a fluoroethylene carbonate additive     | 400                                                                             | 25               |
| $\text{Li}_{6.5}\text{La}_{2.5}\text{Ba}_{0.5}\text{ZrNbO}_{12}$                           | 25                    | Employing ionic liquid electrolyte (ILE) thin interlayers at the electrodes/electrolyte interface | 265                                                                             | 45               |
| $\text{Li}_7\text{La}_{2.75}\text{Ca}_{0.25}\text{Zr}_{1.75}\text{Nb}_{0.25}\text{O}_{12}$ | RT                    | Gel electrolyte was used as an interlayer                                                         | 248                                                                             | 46               |
| $\text{Li}_{6.75}\text{La}_3\text{Zr}_{1.75}\text{Nb}_{0.25}\text{O}_{12}$                 | 25                    | $\text{LiCoO}_2$ was deposited by pulsed-laser deposition (PLD)                                   | 170                                                                             | 47               |
| $\text{Li}_7\text{La}_3\text{Zr}_2\text{O}_{12}$                                           | —                     | Deposition of a Nb metal layer onto $\text{Li}_7\text{La}_3\text{Zr}_2\text{O}_{12}$              | 150                                                                             | 48               |
| $\text{Li}_{6.35}\text{Ga}_{0.15}\text{La}_3\text{Zr}_{1.8}\text{Nb}_{0.2}\text{O}_{12}$   | RT                    | A plastic crystal interlayer based on succinonitrile with LiTFSI                                  | 278                                                                             | <b>This work</b> |
|                                                                                            |                       | Interface layer of 3D LLZO frame combined with plastic crystal electrolyte                        | 54                                                                              |                  |

## References

- [1]. A. Luzio, L. Criante, V. D'Innocenzo, M. Caironi, Sci Rep. 2013, 3, 3425.
- [2]. C H Wang, R Z Yu, S Hwang, J W Liang, X N Li, C T Zhao, Y P Sun, J W Wang, N Holmes, R Y Li, H Huang, S Q Zhao, L Zhang, S G Lu, D Su, X L Sun. Energy Storage Mater., 2020, 30, 98-103.
- [3]. G V Alexander, N C Rosero-Navarro, A Miura, K Tadanaga, R Murugan. J. Mater. Chem. A, 2018, 6, 21018.
- [4]. D W Wang, Q Sun, J Luo, J N Liang, Y P Sun, R Y Li, K Adair, L Zhang, R Yang, S G Lu, H Huang, X L Sun. ACS Appl. Mater. Interfaces, 2019, 11, 4954–4961.
- [5]. M L Cai, Y Lu, J M Su, Y D Ruan, C H Chen, B V R Chowdari, Z Y Wen. ACS Appl. Mater. Interfaces, 2019, 11, 35030-35038.
- [6]. T Liu, Y B Zhang, X Zhang, L Wang, S X Zhao, Y H Lin, Y Shen, J Luo, L L Li, C W Nan. J. Mater. Chem. A, 2018,6, 4649-4657.
